# Supplementary material for: Maternal vitamin D intake and BMI during pregnancy in relation to child’s growth and weight status from birth to 8 years: a large national cohort study
Source: HighWire-hosted journal article supplement (doi:10.1136/bmjopen-2021-048980), 2021-10-01
Supplement: bmjopen-2021-048980supp001_data_supplement.pdf [file bmjopen-2021-048980supp001_data_supplement.pdf]

**Supplementary table 1.** Study population retention and anthropometric measures of the children at the 11 ages.

| Intended age | Reported age      | Weight (kg) |            | Response rate | Height (cm) |           | Response rate |
|--------------|-------------------|-------------|------------|---------------|-------------|-----------|---------------|
|              |                   | N           | Mean (SD)  | %             | N           | Mean (SD) | %             |
| 1.5 months   | 1.4 (0.2) months  | 56 625      | 5.0 (0.7)  | 84            | 45 745      | 57 (2.3)  | 67            |
| 3 months     | 3.1 (0.3) months  | 62 237      | 6.4 (0.8)  | 92            | 61 266      | 62 (2.5)  | 91            |
| 6 months     | 5.8 (0.5) months  | 60 515      | 7.9 (1.0)  | 89            | 60 224      | 68 (2.5)  | 89            |
| 8 months     | 8.0 (0.8) months  | 49 528      | 8.8 (1.0)  | 73            | 49 354      | 71 (2.7)  | 73            |
| 12 months    | 12.2 (0.6) months | 49 609      | 9.9 (1.1)  | 73            | 49 686      | 76 (2.7)  | 73            |
| 15-18 months | 16.0 (1.3) months | 50 393      | 10.9 (1.2) | 75            | 50 168      | 81 (3.0)  | 74            |
| 2 years      | 2.1 (0.2) years   | 25 195      | 13.0 (1.5) | 37            | 25 346      | 89 (3.7)  | 37            |
| 3 years      | 3.0 (0.1) years   | 36 987      | 15.1 (1.8) | 55            | 36 365      | 97 (3.8)  | 54            |
| 5 years      | 5.2 (0.3) years   | 30 288      | 20.0 (2.8) | 45            | 31 671      | 113 (5.2) | 47            |
| 7 years      | 7.1 (0.1) years   | 36 480      | 25.1 (4.0) | 54            | 38 130      | 126 (5.4) | 56            |
| 8 years      | 8.1 (0.1) years   | 23 123      | 28.2 (4.5) | 34            | 24 611      | 132 (5.7) | 36            |

**Supplementary table 2.** Cut-offs of overweight in children

| Age (years) | Overweight cut-offs <sup>a, b</sup> |       | Prevalence (%) <sup>c</sup> |       |
|-------------|-------------------------------------|-------|-----------------------------|-------|
|             | Boys                                | Girls | Boys                        | Girls |
| 3           | 17.85                               | 17.64 | 9.9                         | 9.5   |
| 5           | 17.39                               | 17.23 | 18.8                        | 20.5  |
| 8           | 18.41                               | 18.28 | 5.5                         | 8.4   |

<sup>a</sup> Cole TJ, Lobstein T. Extended international (IOTF) body mass index cut-offs for thinness, overweight and obesity. *Pediatr Obes.* 2012;7(4):284-294. doi:10.1111/j.2047-6310.2012.00064.x

<sup>b</sup> All children with a body mass index equal to, or above, the cut-off are denoted as overweight

<sup>c</sup> Based on child's body mass index calculated from the predicted anthropometric data.

**Supplementary table 3.** Associations between maternal vitamin D intake from foods alone, and from supplements alone, and predicted weight growth trajectories from 1 month to 2 years of age.

|                                                                  | Infancy             |                     |                     | Toddlerhood         |                     |                     |
|------------------------------------------------------------------|---------------------|---------------------|---------------------|---------------------|---------------------|---------------------|
|                                                                  | 1 month             | 3 months            | 6 months            | 12 months           | 18 months           | 2 years             |
|                                                                  | Beta (95% CI)       | Beta (95% CI)       | Beta (95% CI)       | Beta (95% CI)       | Beta (95% CI)       | Beta (95% CI)       |
| <b>Maternal vitamin D intake from foods alone</b>                |                     |                     |                     |                     |                     |                     |
| <i>All mothers</i><br><i>n=66 840</i>                            |                     |                     |                     |                     |                     |                     |
| <2.5 µg                                                          |                     |                     |                     |                     |                     |                     |
| 2.5-4.9 µg                                                       | -5.8 (-14.6, 2.99)  | -6.2 (-15.1, 2.7)   | -6.7 (-16.1, 2.6)   | -7.9 (-19.2, 3.5)   | -9.0 (-23.1, 5.1)   | -10.2 (-27.4, 7.1)  |
| 5-7.5 µg                                                         | -9.7 (-22.8, 3.5)   | -7.1 (-20.4, 6.2)   | -3.3 (-17.4, 10.7)  | 4.3 (-12.5, 21.1)   | 11.9 (-8.9, 32.7)   | 19.5 (-5.9, 45.0)   |
| >7.5 µg                                                          | -12.0 (-34.8, 10.8) | -11.6 (-34.7, 11.4) | -11.0 (-35.3, 13.3) | -9.8 (-39.0, 19.3)  | -8.7 (-44.7, 27.4)  | -7.5 (-51.6, 36.6)  |
| <i>Mothers with normal weight<sup>a</sup></i><br><i>n=41 970</i> |                     |                     |                     |                     |                     |                     |
| <2.5 µg                                                          |                     |                     |                     |                     |                     |                     |
| 2.5-4.9 µg                                                       | -6.4 (-16.2, 3.4)   | -7.0 (-16.9, 3.0)   | -7.8 (-18.3, 2.7)   | -9.3 (-22.0, 3.4)   | -10.9 (-26.7, 4.9)  | -12.5 (-31.9, 6.9)  |
| 5-7.5 µg                                                         | -7.3 (-21.7, 7.1)   | -5.4 (-19.9, 9.2)   | -2.5 (-17.8, 12.9)  | 3.3 (-15.1, 21.8)   | 9.1 (-13.8, 32.0)   | 14.9 (-13.1, 42.9)  |
| >7.5 µg                                                          | -14.9 (-40.1, 10.3) | -14.8 (-40.3, 10.7) | -14.6 (-41.5, 12.3) | -14.1 (-46.5, 18.2) | -13.7 (-53.8, 26.4) | -13.2 (-62.3, 35.8) |
| <i>Mothers with overweight<sup>b</sup></i><br><i>n=20 080</i>    |                     |                     |                     |                     |                     |                     |
| <2.5 µg                                                          |                     |                     |                     |                     |                     |                     |
| 2.5-4.9 µg                                                       | -4.3 (-17.5, 9.0)   | -4.3 (-17.7, 9.2)   | -4.3 (-18.5, 9.9)   | -4.4 (-21.6, 12.8)  | -4.5 (-25.9, 16.9)  | -4.6 (-30.9, 21.7)  |
| 5-7.5 µg                                                         | -15.3 (-35.2, 4.6)  | -11.3 (-31.4, 8.8)  | -5.3 (-26.6, 15.9)  | 6.6 (-19.0, 32.3)   | 18.6 (-13.2, 50.4)  | 30.6 (-8.4, 69.6)   |
| >7.5 µg                                                          | -5.1 (-39.1, 28.9)  | -4.1 (-38.5, 30.3)  | -2.6 (-38.9, 33.7)  | 0.3 (-43.5, 44.1)   | 3.3 (-51.1, 57.7)   | 6.2 (-60.4, 72.8)   |
| <b>Maternal vitamin D intake from supplements alone</b>          |                     |                     |                     |                     |                     |                     |
| <i>All mothers</i><br><i>n=66 840</i>                            |                     |                     |                     |                     |                     |                     |
| <5 µg                                                            |                     |                     |                     |                     |                     |                     |
| 5-9.9 µg                                                         | -11.8 (-21.6, -2.1) | -11.4 (-21.3, -1.5) | -10.8 (-21.2, -0.3) | -9.5 (-22.1, 3.2)   | -8.2 (-23.9, 7.6)   | -6.9 (-26.2, 12.4)  |
| 10-15 µg                                                         | -4.0 (-17.4, 9.3)   | -4.1 (-17.6, 9.4)   | -4.1 (-18.4, 10.2)  | -4.1 (-21.4, 13.2)  | -4.2 (-25.7, 17.3)  | -4.2 (-30.7, 22.2)  |
| >15 µg                                                           | -8.5 (-21.5, 4.5)   | -7.0 (-20.1, 6.2)   | -4.6 (-18.5, 9.3)   | 0.1 (-16.8, 17.9)   | 4.8 (-16.2, 25.8)   | 9.5 (-16.2, 35.3)   |
| <i>Mothers with normal weight<sup>a</sup></i><br><i>n=41 970</i> |                     |                     |                     |                     |                     |                     |
| <5 µg                                                            |                     |                     |                     |                     |                     |                     |

|                                                                                                                                                                                                                                                                                                |                    |                     |                     |                     |                     |                     |
|------------------------------------------------------------------------------------------------------------------------------------------------------------------------------------------------------------------------------------------------------------------------------------------------|--------------------|---------------------|---------------------|---------------------|---------------------|---------------------|
| 5-9.9 µg                                                                                                                                                                                                                                                                                       | -10.6 (-21.4, 0.2) | -11.7 (-22.6, -0.7) | -13.3 (-24.9, -1.8) | -16.6 (-30.6, -2.6) | -19.9 (-37.4, -2.5) | -23.2 (-44.6, -1.8) |
| 10-15 µg                                                                                                                                                                                                                                                                                       | -5.8 (-20.4, 8.7)  | -7.1 (-21.9, 7.6)   | -9.1 (-24.7, 6.5)   | -13.0 (-31.9, 5.9)  | -16.9 (-40.5, 6.6)  | -20.9 (-49.7, 8.0)  |
| >15 µg                                                                                                                                                                                                                                                                                         | -8.6 (-22.5, 5.4)  | -8.2 (-22.4, 5.9)   | -7.7 (-22.6, 7.3)   | -6.6 (-24.7, 11.5)  | -5.6 (-28.1, 17.0)  | -4.5 (-32.2, 23.2)  |
| <b>Mothers with overweight<sup>b</sup></b><br><b>n=20 080</b>                                                                                                                                                                                                                                  |                    |                     |                     |                     |                     |                     |
| <5 µg                                                                                                                                                                                                                                                                                          |                    |                     |                     |                     |                     |                     |
| 5-9.9 µg                                                                                                                                                                                                                                                                                       | -14.9 (-29.8, 0.1) | -10.8 (-25.9, 4.3)  | -4.7 (-20.7, 11.3)  | 7.5 (-11.8, 26.9)   | 20.0 (-4.4, 43.9)   | 32.0 (2.3, 61.6)    |
| 10-15 µg                                                                                                                                                                                                                                                                                       | 0.2 (-21.6, 22.0)  | 3.2 (-18.8, 25.3)   | 7.8 (-15.5, 31.2)   | 17.0 (-11.3, 45.3)  | 26.1 (-9.2, 61.4)   | 35.2 (-8.1, 78.6)   |
| >15 µg                                                                                                                                                                                                                                                                                         | -8.4 (-30.2, 13.4) | -4.0 (-26.0, 18.1)  | 2.7 (-20.6, 26.0)   | 16.1 (-12.2, 44.3)  | 29.4 (-5.8, 64.7)   | 42.8 (-0.4, 86.1)   |
| Beta=Beta coefficient, CI=Confidence interval                                                                                                                                                                                                                                                  |                    |                     |                     |                     |                     |                     |
| Effect estimates derive from multilevel mixed effects linear regression model, adjusted for maternal education, parity, maternal milk and yoghurt intake, maternal fiber intake, child's gender and birth weight. The model with all mothers was also adjusted for maternal pre-pregnancy BMI. |                    |                     |                     |                     |                     |                     |
| <sup>a</sup> Mothers with pre-pregnancy BMI 18.5-24.9 kg/m <sup>2</sup>                                                                                                                                                                                                                        |                    |                     |                     |                     |                     |                     |
| <sup>b</sup> Mothers with pre-pregnancy BMI ≥25 kg/m <sup>2</sup>                                                                                                                                                                                                                              |                    |                     |                     |                     |                     |                     |

**Supplementary table 4.** Associations between maternal vitamin D intake from foods alone, and from supplements alone, and predicted weight growth trajectories from 3 years to 8 years of age.

|                                                                  | Preschool age       |                     | School age          |  |
|------------------------------------------------------------------|---------------------|---------------------|---------------------|--|
|                                                                  | 3 years             |                     | 5 years             |  |
|                                                                  | Beta (95% CI)       |                     | Beta (95% CI)       |  |
| <b>Maternal vitamin D intake from foods alone</b>                |                     |                     |                     |  |
| <i>All mothers</i><br><i>n=66 840</i>                            |                     |                     |                     |  |
| <5 µg                                                            |                     |                     |                     |  |
| 5-9.9 µg                                                         | -12.4 (-36.7, 11.8) | -17.0 (-56.0, 22.0) | -23.8 (-85.6, 38.0) |  |
| 10-15 µg                                                         | 34.8 (-0.8, 70.3)   | 65.2 (8.1, 122)     | 111 (20.5, 201)     |  |
| >15 µg                                                           | -5.1 (-66.8, 56.5)  | -0.4 (-99.4, 98.6)  | 6.7 (-150, 163)     |  |
| <i>Mothers with normal weight<sup>a</sup></i><br><i>n=41 970</i> |                     |                     |                     |  |
| <5 µg                                                            |                     |                     |                     |  |
| 5-9.9 µg                                                         | -15.7 (-42.8, 11.5) | -22.0 (-65.8, 21.8) | -31.4 (-100, 37.9)  |  |
| 10-15 µg                                                         | 26.4 (-12.7, 65.6)  | 49.6 (-13.4, 113)   | 84.3 (-15.3, 184)   |  |
| >15 µg                                                           | -12.4 (-81.0, 56.3) | -10.6 (-121, 99.8)  | -8.0 (-183, 167)    |  |
| <i>Mothers with overweight<sup>b</sup></i><br><i>n=20 080</i>    |                     |                     |                     |  |
| <5 µg                                                            |                     |                     |                     |  |
| 5-9.9 µg                                                         | -4.8 (-41.7, 32.1)  | -5.1 (-64.6, 54.2)  | -5.7 (-99.8, 88.3)  |  |
| 10-15 µg                                                         | 54.5 (-0.1, 109)    | 102.4 (14.5, 190)   | 174.3 (35.1, 313)   |  |
| >15 µg                                                           | 12.1 (-81.3, 106)   | 23.9 (-126, 174)    | 41.7 (-196, 280)    |  |
| <b>Maternal vitamin D intake from supplements alone</b>          |                     |                     |                     |  |
| <i>All mothers</i><br><i>n=66 840</i>                            |                     |                     |                     |  |
| <5 µg                                                            |                     |                     |                     |  |
| 5-9.9 µg                                                         | -4.3 (-31.4, 22.8)  | 0.9 (-42.7, 44.6)   | 8.7 (-60.5, 77.9)   |  |
| 10-15 µg                                                         | -4.3 (-41.4, 32.8)  | -4.5 (-64.3, 55.2)  | -4.8 (-99.5, 89.8)  |  |
| >15 µg                                                           | 18.9 (-17.2, 55.1)  | 37.8 (-20.5, 96.0)  | 66.0 (-26.3, 158)   |  |
| <i>Mothers with normal weight<sup>a</sup></i><br><i>n=41 970</i> |                     |                     |                     |  |
| <5 µg                                                            |                     |                     |                     |  |

|                                                                                                                                                                                                                                                                                                |                     |                    |                    |
|------------------------------------------------------------------------------------------------------------------------------------------------------------------------------------------------------------------------------------------------------------------------------------------------|---------------------|--------------------|--------------------|
| 5-9.9 µg                                                                                                                                                                                                                                                                                       | -29.8 (-59.9, 0.3)  | -43.0 (-91.5, 5.4) | -62.8 (-140, 13.9) |
| 10-15 µg                                                                                                                                                                                                                                                                                       | -28.7 (-69.3, 11.9) | -44.4 (-110, 21.0) | -67.9 (-171, 35.6) |
| >15 µg                                                                                                                                                                                                                                                                                         | -2.4 (-41.2, 36.5)  | 1.9 (-60.7, 64.5)  | 8.2 (-90.9, 107)   |
| <b>Mothers with overweight<sup>b</sup></b>                                                                                                                                                                                                                                                     |                     |                    |                    |
| <b>n=20 080</b>                                                                                                                                                                                                                                                                                |                     |                    |                    |
| <5 µg                                                                                                                                                                                                                                                                                          |                     |                    |                    |
| 5-9.9 µg                                                                                                                                                                                                                                                                                       | 56.4 (14.8, 98.0)   | 105 (38.2, 172)    | 179 (72.3, 285)    |
| 10-15 µg                                                                                                                                                                                                                                                                                       | 53.5 (-7.3, 114)    | 90.1 (-7.9, 188)   | 145 (-10.3, 300)   |
| >15 µg                                                                                                                                                                                                                                                                                         | 69.5 (8.8, 130)     | 123 (25.1, 221)    | 203 (48.2, 358)    |
| Beta=Beta coefficient, CI=Confidence interval                                                                                                                                                                                                                                                  |                     |                    |                    |
| Effect estimates derive from multilevel mixed effects linear regression model, adjusted for maternal education, parity, maternal milk and yoghurt intake, maternal fiber intake, child's gender and birth weight. The model with all mothers was also adjusted for maternal pre-pregnancy BMI. |                     |                    |                    |
| <sup>a</sup> Mothers with pre-pregnancy BMI 18.5-24.9 kg/m <sup>2</sup>                                                                                                                                                                                                                        |                     |                    |                    |
| <sup>b</sup> Mothers with pre-pregnancy BMI ≥25 kg/m <sup>2</sup>                                                                                                                                                                                                                              |                     |                    |                    |

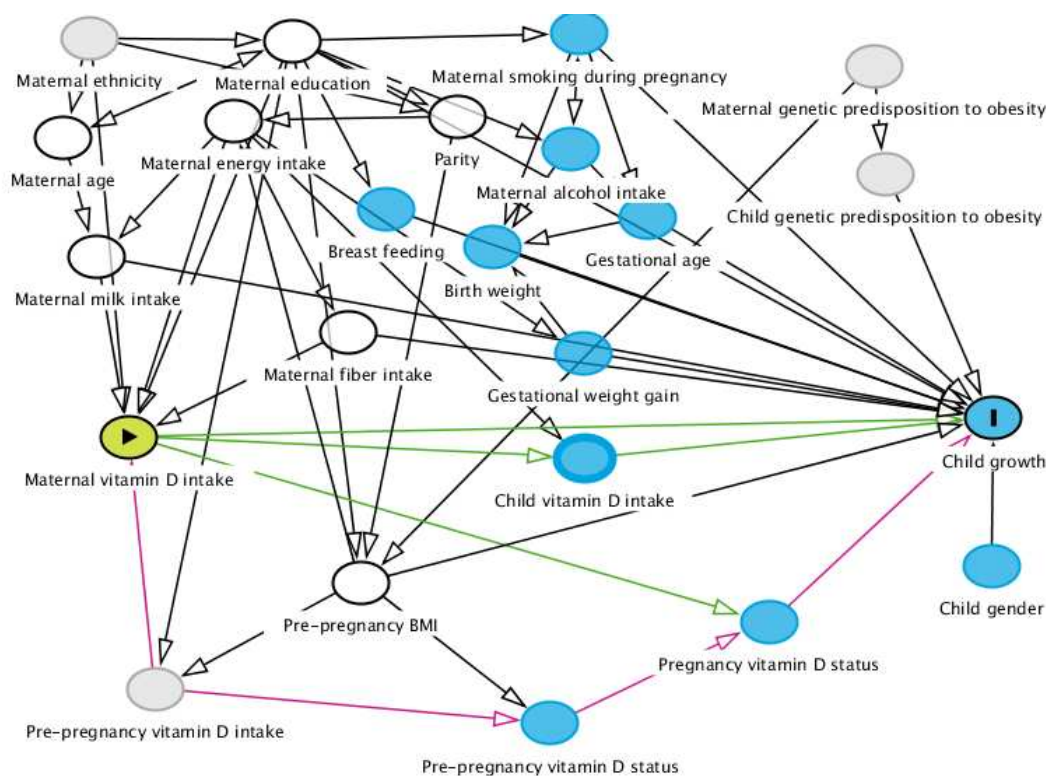

**Supplementary figure 1.** Directed acyclic graph on the suggested association between, exposure, outcome and covariates<sup>a</sup>. The graph is made using the software DAGitty<sup>b</sup>.

Legends: White circle – ancestor of exposure and outcome, adjusted variable; blue circle – ancestor of outcome; grey circle – unobserved variable; black arrow – direct causal effects; green arrow – causal path; pink arrow – biasing path.

<sup>a</sup> Textor J, van der Zander B, Gilthorpe M. S, Liskiewicz M, Ellison G. T. Robust causal inference using directed acyclic graphs: the R package 'dagitty'. *International Journal of Epidemiology* 45(6):1887-1894, 2016.

<sup>b</sup> ([www.dagitty.net/dags.html](http://www.dagitty.net/dags.html)).

**Supplementary table 5.** Adjusted change in siblings' weights and heights from 1 month to 2 years, associated with an increase in maternal total vitamin D intake within sibships.

|                                                                                                                                                                                                                                                                                                                                                                                                                                                                                     | Infancy              |                      |                      | Toddlerhood          |                      |                      |
|-------------------------------------------------------------------------------------------------------------------------------------------------------------------------------------------------------------------------------------------------------------------------------------------------------------------------------------------------------------------------------------------------------------------------------------------------------------------------------------|----------------------|----------------------|----------------------|----------------------|----------------------|----------------------|
|                                                                                                                                                                                                                                                                                                                                                                                                                                                                                     | 1 month              | 3 months             | 6 months             | 12 months            | 18 months            | 2 years              |
| <b>Siblings in the higher maternal vitamin D category</b>                                                                                                                                                                                                                                                                                                                                                                                                                           | <b>Beta (95% CI)</b> | <b>Beta (95% CI)</b> | <b>Beta (95% CI)</b> | <b>Beta (95% CI)</b> | <b>Beta (95% CI)</b> | <b>Beta (95% CI)</b> |
| <b>Weight (g)</b>                                                                                                                                                                                                                                                                                                                                                                                                                                                                   |                      |                      |                      |                      |                      |                      |
| All mothers (n=1216)                                                                                                                                                                                                                                                                                                                                                                                                                                                                | 22.0 (-28.0, 71.9)   | 20.4 (-30.0, 70.9)   | 18.2 (-34.3, 70.7)   | 13.7 (-46.6, 74.0)   | 9.2 (-62.5, 80.8)    | 4.6 (-80.6, 89.8)    |
| Mothers with normal weight <sup>a</sup> (n=837)                                                                                                                                                                                                                                                                                                                                                                                                                                     | 3.2 (-56.6, 63.0)    | 2.0 (-58.2, 62.2)    | 0.3 (-61.7, 62.2)    | -3.3 (-72.8, 66.2)   | -6.8 (-87.8, 74.2)   | -10.4 (-105, 84.6)   |
| Mothers with overweight <sup>b</sup> (n=344)                                                                                                                                                                                                                                                                                                                                                                                                                                        | 31.3 (-57.7, 120)    | 29.6 (-59.9, 119)    | 27.0 (-65.1, 119)    | 21.9 (-81.4, 125)    | 16.9 (-104, 137)     | 11.8 (129, 153)      |
| <b>Height (cm)</b>                                                                                                                                                                                                                                                                                                                                                                                                                                                                  |                      |                      |                      |                      |                      |                      |
| All mothers (n=1216)                                                                                                                                                                                                                                                                                                                                                                                                                                                                | 0.07 (-0.15, 0.29)   | 0.07 (-0.14, 0.29)   | 0.07 (-0.14, 0.29)   | 0.08 (-0.12, 0.28)   | 0.08 (-0.11, 0.27)   | 0.08 (-0.11, 0.27)   |
| Mothers with normal weight <sup>a</sup> (n=837)                                                                                                                                                                                                                                                                                                                                                                                                                                     | 0.02 (-0.22, 0.27)   | 0.02 (-0.22, 0.27)   | 0.03 (-0.21, 0.26)   | 0.04 (-0.19, 0.26)   | 0.04 (-0.17, 0.26)   | 0.05 (-0.16, 0.26)   |
| Mothers with overweight <sup>b</sup> (n=344)                                                                                                                                                                                                                                                                                                                                                                                                                                        | 0.11 (-0.26, 0.47)   | 0.10 (-0.25, 0.46)   | 0.10 (-0.25, 0.45)   | 0.09 (-0.24, 0.42)   | 0.08 (-0.24, 0.40)   | 0.07 (-0.24, 0.39)   |
| Beta=Beta coefficient, CI=Confidence interval                                                                                                                                                                                                                                                                                                                                                                                                                                       |                      |                      |                      |                      |                      |                      |
| Effect estimates derived by multilevel mixed effects linear regression model, adjusted for maternal education, parity, maternal milk and yoghurt intake, maternal fiber intake, child's gender and birth weight. The model with all mothers was also adjusted for maternal pre-pregnancy BMI. The siblings in the lower maternal vitamin D category was used as reference in separate analyses of overall (n=1211), mothers with normal weight (n=845) and with overweight (n=320). |                      |                      |                      |                      |                      |                      |
| <sup>a</sup> Mothers with pre-pregnancy BMI 18.5-24.9 kg/m <sup>2</sup>                                                                                                                                                                                                                                                                                                                                                                                                             |                      |                      |                      |                      |                      |                      |
| <sup>b</sup> Mothers with pre-pregnancy BMI ≥25 kg/m <sup>2</sup>                                                                                                                                                                                                                                                                                                                                                                                                                   |                      |                      |                      |                      |                      |                      |



**Supplementary table 6.** Adjusted changes in siblings' weights and heights from 3 years to 8 years of age, associated with an increase in maternal vitamin D intake within sibships.

|                                                                                                                                                                                                                                                                                                                                                                                                                                                                                     | Preschool age      |                    | School age          |
|-------------------------------------------------------------------------------------------------------------------------------------------------------------------------------------------------------------------------------------------------------------------------------------------------------------------------------------------------------------------------------------------------------------------------------------------------------------------------------------|--------------------|--------------------|---------------------|
|                                                                                                                                                                                                                                                                                                                                                                                                                                                                                     | 3 years            | 5 years            | 8 years             |
| Sibling in the higher maternal vitamin D category                                                                                                                                                                                                                                                                                                                                                                                                                                   | Beta (95% CI)      |                    | Beta (95% CI)       |
| <b>Weight (in g)</b>                                                                                                                                                                                                                                                                                                                                                                                                                                                                |                    |                    |                     |
| All mothers (n=1216)                                                                                                                                                                                                                                                                                                                                                                                                                                                                | -4.4 (-120, 111)   | -22.5 (-204, 159)  | -49.6 (-334, 235)   |
| Mothers with normal weight <sup>a</sup> (n=837)                                                                                                                                                                                                                                                                                                                                                                                                                                     | -17.5 (-145, 110)  | -31.7 (-230, 166)  | -53.0 (-363, 257)   |
| Mothers with overweight <sup>b</sup> (n=344)                                                                                                                                                                                                                                                                                                                                                                                                                                        | 1.6 (-187, 191)    | -18.7 (-313, 276)  | -49.2 (-510, 411)   |
| <b>Height (in cm)</b>                                                                                                                                                                                                                                                                                                                                                                                                                                                               |                    |                    |                     |
| All mothers (n=1216)                                                                                                                                                                                                                                                                                                                                                                                                                                                                | 0.09 (-0.10, 0.26) | 0.10 (-0.12, 0.31) | 0.11 (-0.20, 0.42)  |
| Mothers with normal weight <sup>a</sup> (n=837)                                                                                                                                                                                                                                                                                                                                                                                                                                     | 0.07 (-0.14, 0.28) | 0.10 (-0.14, 0.34) | 0.15 (-0.19, 0.49)  |
| Mothers with overweight <sup>b</sup> (n=344)                                                                                                                                                                                                                                                                                                                                                                                                                                        | 0.05 (-0.26, 0.36) | 0.01 (-0.34, 0.37) | -0.04 (-0.55, 0.46) |
| Beta=Beta coefficient, CI=Confidence interval                                                                                                                                                                                                                                                                                                                                                                                                                                       |                    |                    |                     |
| Effect estimates derived by multilevel mixed effects linear regression model, adjusted for maternal education, parity, maternal milk and yoghurt intake, maternal fiber intake, child's gender and birth weight. The model with all mothers was also adjusted for maternal pre-pregnancy BMI. The siblings in the lower maternal vitamin D category was used as reference in separate analyses of overall (n=1211), mothers with normal weight (n=845) and with overweight (n=320). |                    |                    |                     |
| <sup>a</sup> Mothers with pre-pregnancy BMI 18.5-24.9 kg/m <sup>2</sup>                                                                                                                                                                                                                                                                                                                                                                                                             |                    |                    |                     |
| <sup>b</sup> Mothers with pre-pregnancy BMI ≥25 kg/m <sup>2</sup>                                                                                                                                                                                                                                                                                                                                                                                                                   |                    |                    |                     |

**Supplementary table 7.** Adjusted changes in siblings' risk of overweight at 3, 5 and 8 years, associated with an increase in maternal total vitamin D intake within sibships.

|                                                                                                                                                                                                                                                                                                                                                                                                                                                                                     | <b>Risk of childhood overweight <sup>a</sup></b> |
|-------------------------------------------------------------------------------------------------------------------------------------------------------------------------------------------------------------------------------------------------------------------------------------------------------------------------------------------------------------------------------------------------------------------------------------------------------------------------------------|--------------------------------------------------|
|                                                                                                                                                                                                                                                                                                                                                                                                                                                                                     | <b>OR (95% CI)</b>                               |
| <b>Sibling in the higher maternal vitamin D category</b>                                                                                                                                                                                                                                                                                                                                                                                                                            |                                                  |
| <b>All mothers (n=1216)</b>                                                                                                                                                                                                                                                                                                                                                                                                                                                         |                                                  |
| 3 years                                                                                                                                                                                                                                                                                                                                                                                                                                                                             | 0.97 (0.75, 1.26)                                |
| 5 years                                                                                                                                                                                                                                                                                                                                                                                                                                                                             | 0.92 (0.76, 1.12)                                |
| 8 years                                                                                                                                                                                                                                                                                                                                                                                                                                                                             | 1.03 (0.80, 1.32)                                |
| <b>Mothers with normal weight <sup>b</sup> (n=837)</b>                                                                                                                                                                                                                                                                                                                                                                                                                              |                                                  |
| 3 years                                                                                                                                                                                                                                                                                                                                                                                                                                                                             | 0.89 (0.62, 1.28)                                |
| 5 years                                                                                                                                                                                                                                                                                                                                                                                                                                                                             | 0.92 (0.71, 1.20)                                |
| 8 years                                                                                                                                                                                                                                                                                                                                                                                                                                                                             | 0.99 (0.70, 1.39)                                |
| <b>Mothers with overweight <sup>c</sup> (n=344)</b>                                                                                                                                                                                                                                                                                                                                                                                                                                 |                                                  |
| 3 years                                                                                                                                                                                                                                                                                                                                                                                                                                                                             | 1.04 (0.69, 1.57)                                |
| 5 years                                                                                                                                                                                                                                                                                                                                                                                                                                                                             | 0.90 (0.64, 1.24)                                |
| 8 years                                                                                                                                                                                                                                                                                                                                                                                                                                                                             | 1.03 (0.68, 1.57)                                |
| OR=Odds Ratio, CI=Confidence interval                                                                                                                                                                                                                                                                                                                                                                                                                                               |                                                  |
| Effect estimates derived by multilevel mixed effects linear regression model, adjusted for maternal education, parity, maternal milk and yoghurt intake, maternal fiber intake, child's gender and birth weight. The model with all mothers was also adjusted for maternal pre-pregnancy BMI. The siblings in the lower maternal vitamin D category was used as reference in separate analyses of overall (n=1211), mothers with normal weight (n=845) and with overweight (n=320). |                                                  |
| <sup>a</sup> Overweight, including obesity, defined by Cole TJ, Lobstein T. Extended international (IOTF) body mass index cut-offs for thinness, overweight and obesity. <i>Pediatr Obes.</i> 2012;7(4):284-294. doi:10.1111/j.2047-6310.2012.00064.x                                                                                                                                                                                                                               |                                                  |
| <sup>b</sup> Mothers with pre-pregnancy BMI 18.5-24.9 kg/m <sup>2</sup>                                                                                                                                                                                                                                                                                                                                                                                                             |                                                  |
| <sup>c</sup> Mothers with pre-pregnancy BMI ≥25 kg/m <sup>2</sup>                                                                                                                                                                                                                                                                                                                                                                                                                   |                                                  |

**Supplementary table 8.** Associations between total maternal vitamin D intake and predicted weight growth velocities and height growth velocities from 1 month to 2 years of age.

| Maternal vitamin D intake                                  | Infancy                             |                                     |                                     | Toddlerhood                         |                                     |                                     |
|------------------------------------------------------------|-------------------------------------|-------------------------------------|-------------------------------------|-------------------------------------|-------------------------------------|-------------------------------------|
|                                                            | 1 month                             | 3 months                            | 6 months                            | 12 months                           | 18 months                           | 2 years                             |
|                                                            | Beta (95% CI)                       | Beta (95% CI)                       | Beta (95% CI)                       | Beta (95% CI)                       | Beta (95% CI)                       | Beta (95% CI)                       |
| <b>All mothers<br/>n=66 840</b>                            |                                     |                                     |                                     |                                     |                                     |                                     |
| <b>Weight growth velocities (g/month)</b>                  |                                     |                                     |                                     |                                     |                                     |                                     |
| <5 µg                                                      |                                     |                                     |                                     |                                     |                                     |                                     |
| 5-9.9 µg                                                   | -0.13 (-2.11, 1.86)                 | -0.11 (-2.04, 1.81)                 | -0.10 (-1.94, 1.75)                 | -0.06 (-1.75, 1.63)                 | -0.03 (-1.60, 1.54)                 | 0.003 (-1.48, 1.49)                 |
| 10-15 µg                                                   | -0.51 (-2.96, 1.94)                 | -0.52 (-2.89, 1.86)                 | -0.53 (-2.80, 1.74)                 | -0.55 (-2.63, 1.53)                 | -0.57 (-2.51, 1.36)                 | -0.60 (-2.43, 1.23)                 |
| >15 µg                                                     | -0.25 (-2.70, 2.20)                 | -0.24 (-2.62, 2.14)                 | -0.24 (-2.51, 2.04)                 | -0.22 (-2.31, 1.87)                 | -0.20 (-2.14, 1.73)                 | -0.19 (-2.03, 1.65)                 |
| <b>Height growth velocities (cm/month)</b>                 |                                     |                                     |                                     |                                     |                                     |                                     |
| <5 µg                                                      |                                     |                                     |                                     |                                     |                                     |                                     |
| 5-9.9 µg                                                   | 4x10 <sup>-5</sup> (-0.004, 0.004)  | 4x10 <sup>-5</sup> (-0.004, 0.004)  | 3x10 <sup>-5</sup> (-0.004, 0.004)  | 3x10 <sup>-5</sup> (-0.004, 0.004)  | 2x10 <sup>-5</sup> (-0.003, 0.003)  | 2x10 <sup>-5</sup> (-0.003, 0.003)  |
| 10-15 µg                                                   | 7x10 <sup>-5</sup> (-0.005, 0.005)  | 3x10 <sup>-5</sup> (-0.005, 0.005)  | -3x10 <sup>-5</sup> (-0.005, 0.005) | -2x10 <sup>-4</sup> (-0.005, 0.004) | -3x10 <sup>-4</sup> (-0.004, 0.004) | -4x10 <sup>-4</sup> (-0.004, 0.003) |
| >15 µg                                                     | 7x10 <sup>-4</sup> (-0.004, 0.006)  | 7x10 <sup>-4</sup> (-0.004, 0.006)  | 7x10 <sup>-4</sup> (-0.004, 0.005)  | 6x10 <sup>-4</sup> (-0.004, 0.005)  | 5x10 <sup>-4</sup> (-0.004, 0.005)  | 5x10 <sup>-4</sup> (-0.003, 0.004)  |
| <b>Mothers with normal weight<sup>a</sup><br/>n=41 970</b> |                                     |                                     |                                     |                                     |                                     |                                     |
| <b>Weight growth velocities (g/month)</b>                  |                                     |                                     |                                     |                                     |                                     |                                     |
| <5 µg                                                      |                                     |                                     |                                     |                                     |                                     |                                     |
| 5-9.9 µg                                                   | -1.03 (-3.28, 1.22)                 | -1.00 (-3.18, 1.18)                 | -0.96 (-3.04, 1.12)                 | -0.88 (-2.79, 1.02)                 | -0.80 (-2.57, 0.96)                 | -0.73 (-2.40, 0.95)                 |
| 10-15 µg                                                   | -1.97 (-4.69, 0.75)                 | -1.95 (-4.59, 0.69)                 | -1.92 (-4.44, 0.60)                 | -1.86 (-4.17, 0.45)                 | -1.80 (-3.94, 0.35)                 | -1.74 (-3.77, 0.29)                 |
| >15 µg                                                     | -1.17 (-3.86, 1.53)                 | -1.14 (-3.76, 1.47)                 | -1.11 (-3.60, 1.38)                 | -1.05 (-3.34, 1.24)                 | -0.99 (-3.11, 1.13)                 | -0.93 (-2.94, 1.08)                 |
| <b>Height growth velocities (cm/month)</b>                 |                                     |                                     |                                     |                                     |                                     |                                     |
| <5 µg                                                      |                                     |                                     |                                     |                                     |                                     |                                     |
| 5-9.9 µg                                                   | -8x10 <sup>-5</sup> (-0.005, 0.005) | -8x10 <sup>-5</sup> (-0.005, 0.005) | -8x10 <sup>-5</sup> (-0.004, 0.004) | -8x10 <sup>-5</sup> (-0.004, 0.004) | -8x10 <sup>-5</sup> (-0.004, 0.004) | -8x10 <sup>-5</sup> (-0.004, 0.003) |
| 10-15 µg                                                   | -4x10 <sup>-4</sup> (-0.006, 0.005) | -5x10 <sup>-4</sup> (-0.006, 0.005) | -5x10 <sup>-4</sup> (-0.006, 0.005) | -6x10 <sup>-4</sup> (-0.006, 0.004) | -8x10 <sup>-4</sup> (-0.005, 0.004) | -9x10 <sup>-4</sup> (-0.005, 0.003) |
| >15 µg                                                     | 7x10 <sup>-4</sup> (-0.005, 0.006)  | 6x10 <sup>-4</sup> (-0.005, 0.006)  | 6x10 <sup>-4</sup> (-0.005, 0.006)  | -6x10 <sup>-4</sup> (-0.004, 0.005) | -5x10 <sup>-4</sup> (-0.004, 0.005) | -4x10 <sup>-4</sup> (-0.004, 0.005) |

| <b>Mothers with overweight<sup>b</sup></b>                                                                                                                                                                                                                                                     |                                     |                                     |                                     |                                     |                                     |                                     |
|------------------------------------------------------------------------------------------------------------------------------------------------------------------------------------------------------------------------------------------------------------------------------------------------|-------------------------------------|-------------------------------------|-------------------------------------|-------------------------------------|-------------------------------------|-------------------------------------|
| <b>n=20 080</b>                                                                                                                                                                                                                                                                                |                                     |                                     |                                     |                                     |                                     |                                     |
| <b>Weight growth velocities (g/month)</b>                                                                                                                                                                                                                                                      |                                     |                                     |                                     |                                     |                                     |                                     |
| <5 µg                                                                                                                                                                                                                                                                                          |                                     |                                     |                                     |                                     |                                     |                                     |
| 5-9.9 µg                                                                                                                                                                                                                                                                                       | 1.17 (-1.87, 1.22)                  | 1.18 (-1.68, 4.03)                  | 1.19 (-1.54, 3.92)                  | 1.22 (-1.28, 3.72)                  | 1.25 (-1.07, 3.56)                  | 1.28 (-0.91, 3.47)                  |
| 10-15 µg                                                                                                                                                                                                                                                                                       | 2.23 (-1.54, 6.00)                  | 2.20 (-1.46, 5.85)                  | 2.15 (-1.35, 5.64)                  | 2.05 (-1.15, 5.25)                  | 1.95 (-1.02, 4.92)                  | 1.85 (-0.95, 4.66)                  |
| >15 µg                                                                                                                                                                                                                                                                                         | 0.68 (-3.29, 4.65)                  | 0.72 (-3.13, 4.57)                  | 0.78 (-2.90, 4.45)                  | 0.89 (-2.48, 4.26)                  | 1.01 (-2.11, 4.13)                  | 1.13 (-1.83, 4.08)                  |
| <b>Height growth velocities (cm/month)</b>                                                                                                                                                                                                                                                     |                                     |                                     |                                     |                                     |                                     |                                     |
| <5 µg                                                                                                                                                                                                                                                                                          |                                     |                                     |                                     |                                     |                                     |                                     |
| 5-9.9 µg                                                                                                                                                                                                                                                                                       | -3x10 <sup>-4</sup> (-0.006, 0.006) | -2x10 <sup>-4</sup> (-0.006, 0.006) | -2x10 <sup>-4</sup> (-0.006, 0.006) | -1x10 <sup>-4</sup> (-0.005, 0.005) | 4x10 <sup>-5</sup> (-0.005, 0.005)  | 4x10 <sup>-5</sup> (-0.005, 0.005)  |
| 10-15 µg                                                                                                                                                                                                                                                                                       | 6x10 <sup>-4</sup> (-0.007, 0.008)  | 6x10 <sup>-4</sup> (-0.007, 0.008)  | 6x10 <sup>-4</sup> (-0.007, 0.008)  | 6x10 <sup>-4</sup> (-0.006, 0.007)  | 5x10 <sup>-4</sup> (-0.006, 0.007)  | 6x10 <sup>-4</sup> (-0.005, 0.006)  |
| >15 µg                                                                                                                                                                                                                                                                                         | -6x10 <sup>-4</sup> (-0.009, 0.008) | -5x10 <sup>-4</sup> (-0.009, 0.008) | -4x10 <sup>-4</sup> (-0.008, 0.007) | -3x10 <sup>-4</sup> (-0.007, 0.007) | -1x10 <sup>-4</sup> (-0.007, 0.006) | -5x10 <sup>-5</sup> (-0.006, 0.006) |
| Beta=Beta coefficient, CI=Confidence interval                                                                                                                                                                                                                                                  |                                     |                                     |                                     |                                     |                                     |                                     |
| Effect estimates derive from multilevel mixed effects linear regression model, adjusted for maternal education, parity, maternal milk and yoghurt intake, maternal fiber intake, child's gender and birth weight. The model with all mothers was also adjusted for maternal pre-pregnancy BMI. |                                     |                                     |                                     |                                     |                                     |                                     |
| <sup>a</sup> Mothers with pre-pregnancy BMI 18.5-24.9 kg/m <sup>2</sup>                                                                                                                                                                                                                        |                                     |                                     |                                     |                                     |                                     |                                     |
| <sup>b</sup> Mothers with pre-pregnancy BMI ≥25 kg/m <sup>2</sup>                                                                                                                                                                                                                              |                                     |                                     |                                     |                                     |                                     |                                     |

**Supplementary table 9.** Associations between total maternal vitamin D intake and predicted weight growth velocities and height growth velocities from 3 years to 8 years of age.

|                                                                  | <b>Preschool age</b>                |                                     | <b>School age</b>                   |
|------------------------------------------------------------------|-------------------------------------|-------------------------------------|-------------------------------------|
|                                                                  | <b>3 years</b>                      | <b>5 years</b>                      | <b>8 years</b>                      |
| <b>Maternal vitamin D intake</b>                                 | <b>Beta (95% CI)</b>                | <b>Beta (95% CI)</b>                | <b>Beta (95% CI)</b>                |
| <i>All mothers</i><br><i>n=66 840</i>                            |                                     |                                     |                                     |
| <i>Weight growth velocities (g/month)</i>                        |                                     |                                     |                                     |
| <5 µg                                                            |                                     |                                     |                                     |
| 5-9.9 µg                                                         | 0.07 (-1.39, 1.52)                  | 0.20 (-1.71, 2.12)                  | 0.40 (-2.80, 3.61)                  |
| 10-15 µg                                                         | -0.64 (-2.44, 1.15)                 | -0.73 (-3.09, 1.63)                 | -0.86 (-4.81, 3.08)                 |
| >15 µg                                                           | -0.16 (-1.96, 1.64)                 | -0.10 (-2.46, 2.26)                 | -0.007 (-3.95, 3.93)                |
| <i>Height growth velocities (cm/month)</i>                       |                                     |                                     |                                     |
| <5 µg                                                            |                                     |                                     |                                     |
| 5-9.9 µg                                                         | 4x10 <sup>-6</sup> (-0.003, 0.003)  | -4x10 <sup>-5</sup> (-0.004, 0.004) | -5x10 <sup>-5</sup> (-0.007, 0.007) |
| 10-15 µg                                                         | -7x10 <sup>-4</sup> (-0.004, 0.003) | -0.001 (-0.006, 0.004)              | -0.002 (-0.010, 0.006)              |
| >15 µg                                                           | 3x10 <sup>-4</sup> (-0.003, 0.004)  | 9x10 <sup>-5</sup> (-0.005, 0.005)  | -3x10 <sup>-4</sup> (-0.009, 0.008) |
| <i>Mothers with normal weight<sup>a</sup></i><br><i>n=41 970</i> |                                     |                                     |                                     |
| <i>Weight growth velocities (g/month)</i>                        |                                     |                                     |                                     |
| <5 µg                                                            |                                     |                                     |                                     |
| 5-9.9 µg                                                         | -0.57 (-2.21, 1.07)                 | -0.26 (-2.42, 1.91)                 | -0.21 (-3.42, 3.84)                 |
| 10-15 µg                                                         | -1.61 (-3.60, 0.38)                 | -1.37 (-3.99, 1.25)                 | -1.00 (-5.39, 3.39)                 |
| >15 µg                                                           | -0.80 (-2.78, 1.17)                 | -0.56 (-3.15, 2.04)                 | -0.18 (-4.52, 4.15)                 |
| <i>Height growth velocities (cm/month)</i>                       |                                     |                                     |                                     |
| <5 µg                                                            |                                     |                                     |                                     |
| 5-9.9 µg                                                         | -8x10 <sup>-5</sup> (-0.004, 0.003) | -7x10 <sup>-5</sup> (-0.005, 0.004) | -7x10 <sup>-5</sup> (-0.008, 0.008) |
| 10-15 µg                                                         | -0.001 (-0.005, 0.003)              | -0.002 (-0.007, 0.004)              | -0.002 (-0.011, 0.007)              |
| >15 µg                                                           | 3x10 <sup>-4</sup> (-0.004, 0.004)  | 1x10 <sup>-4</sup> (-0.005, 0.006)  | -2x10 <sup>-4</sup> (-0.009, 0.009) |

|                                                                                                                                                                                                                                                                                                |                                    |                                    |                                    |
|------------------------------------------------------------------------------------------------------------------------------------------------------------------------------------------------------------------------------------------------------------------------------------------------|------------------------------------|------------------------------------|------------------------------------|
| <b>Mothers with overweight <sup>b</sup></b>                                                                                                                                                                                                                                                    |                                    |                                    |                                    |
| <b>n=20 080</b>                                                                                                                                                                                                                                                                                |                                    |                                    |                                    |
| <b>Weight growth velocities (g/month)</b>                                                                                                                                                                                                                                                      |                                    |                                    |                                    |
| <5 µg                                                                                                                                                                                                                                                                                          |                                    |                                    |                                    |
| 5-9.9 µg                                                                                                                                                                                                                                                                                       | 1.33 (-0.81, 3.48)                 | 1.45 (-1.39, 4.29)                 | 1.62 (-3.14, 6.38)                 |
| 10-15 µg                                                                                                                                                                                                                                                                                       | 1.66 (-1.10, 4.41)                 | 1.26 (-2.37, 4.89)                 | 0.67 (-5.42, 6.77)                 |
| >15 µg                                                                                                                                                                                                                                                                                         | 1.36 (-1.54, 4.26)                 | 1.82 (-2.00, 5.64)                 | 2.52 (-3.88, 8.92)                 |
| <b>Height growth velocities (cm/month)</b>                                                                                                                                                                                                                                                     |                                    |                                    |                                    |
| <5 µg                                                                                                                                                                                                                                                                                          |                                    |                                    |                                    |
| 5-9.9 µg                                                                                                                                                                                                                                                                                       | 2x10 <sup>-4</sup> (-0.004, 0.005) | 5x10 <sup>-4</sup> (-0.005, 0.006) | 0.001 (-0.009, 0.011)              |
| 10-15 µg                                                                                                                                                                                                                                                                                       | 5x10 <sup>-4</sup> (-0.005, 0.006) | 4x10 <sup>-4</sup> (-0.007, 0.008) | 2x10 <sup>-4</sup> (-0.013, 0.013) |
| >15 µg                                                                                                                                                                                                                                                                                         | 4x10 <sup>-4</sup> (-0.006, 0.006) | 0.001 (-0.007, 0.009)              | 0.002 (-0.011, 0.015)              |
| Beta=Beta coefficient, CI=Confidence interval                                                                                                                                                                                                                                                  |                                    |                                    |                                    |
| Effect estimates derive from multilevel mixed effects linear regression model, adjusted for maternal education, parity, maternal milk and yoghurt intake, maternal fiber intake, child's gender and birth weight. The model with all mothers was also adjusted for maternal pre-pregnancy BMI. |                                    |                                    |                                    |
| <sup>a</sup> Mothers with pre-pregnancy BMI 18.5-24.9 kg/m <sup>2</sup>                                                                                                                                                                                                                        |                                    |                                    |                                    |
| <sup>b</sup> Mothers with pre-pregnancy BMI ≥25 kg/m <sup>2</sup>                                                                                                                                                                                                                              |                                    |                                    |                                    |

**Supplementary table 10.** Associations (OR and 95% CI) between total maternal vitamin D intake and risk of childhood overweight at 3 years, 5 years and 8 years, using reported anthropometrics.

| Maternal vitamin D intake                      | Risk of childhood overweight <sup>a</sup> |
|------------------------------------------------|-------------------------------------------|
|                                                | OR (95% CI)                               |
| <b>All mothers</b>                             |                                           |
| <b>3 years (n=34 438)</b>                      |                                           |
| <5 µg                                          |                                           |
| 5-9.9 µg                                       | 1.00 (0.93, 1.08)                         |
| 10-15 µg                                       | 0.96 (0.87, 1.06)                         |
| >15 µg                                         | 0.89 (0.81, 0.98)                         |
| <b>5 years (n=29 301)</b>                      |                                           |
| <5 µg                                          |                                           |
| 5-9.9 µg                                       | 0.97 (0.88, 1.06)                         |
| 10-15 µg                                       | 0.97 (0.87, 1.08)                         |
| >15 µg                                         | 0.95 (0.85, 1.06)                         |
| <b>8 years (n=22 447)</b>                      |                                           |
| <5 µg                                          |                                           |
| 5-9.9 µg                                       | 1.10 (1.00, 1.20)                         |
| 10-15 µg                                       | 1.05 (0.94, 1.17)                         |
| >15 µg                                         | 1.06 (0.95, 1.18)                         |
| <b>Mothers with normal weight <sup>b</sup></b> |                                           |
| <b>3 years (n=22 863)</b>                      |                                           |
| <5 µg                                          |                                           |
| 5-9.9 µg                                       | 0.98 (0.89, 1.08)                         |
| 10-15 µg                                       | 0.95 (0.84, 1.07)                         |
| >15 µg                                         | 0.87 (0.77, 0.98)                         |
| <b>5 years (n=19 767)</b>                      |                                           |
| <5 µg                                          |                                           |
| 5-9.9 µg                                       | 0.98 (0.87, 1.10)                         |
| 10-15 µg                                       | 0.94 (0.81, 1.08)                         |
| >15 µg                                         | 0.90 (0.78, 1.04)                         |
| <b>8 years (n=15 171)</b>                      |                                           |
| <5 µg                                          |                                           |
| 5-9.9 µg                                       | 1.03 (0.91, 1.16)                         |
| 10-15 µg                                       | 0.96 (0.83, 1.11)                         |
| >15 µg                                         | 1.02 (0.89, 1.18)                         |
| <b>Mothers with overweight <sup>c</sup></b>    |                                           |
| <b>3 years (n=10 633)</b>                      |                                           |
| <5 µg                                          |                                           |
| 5-9.9 µg                                       | 1.02 (0.90, 1.15)                         |
| 10-15 µg                                       | 0.96 (0.82, 1.13)                         |
| >15 µg                                         | 0.88 (0.74, 1.04)                         |
| <b>5 years (n=8709)</b>                        |                                           |
| <5 µg                                          |                                           |
| 5-9.9 µg                                       | 0.94 (0.82, 1.08)                         |

|                                                                                                                                                                                                                                                       |                   |
|-------------------------------------------------------------------------------------------------------------------------------------------------------------------------------------------------------------------------------------------------------|-------------------|
| 10-15 µg                                                                                                                                                                                                                                              | 1.02 (0.86, 1.21) |
| >15 µg                                                                                                                                                                                                                                                | 0.98 (0.82, 1.17) |
| <b>8 years (n=6661)</b>                                                                                                                                                                                                                               |                   |
| <5 µg                                                                                                                                                                                                                                                 |                   |
| 5-9.9 µg                                                                                                                                                                                                                                              | 1.22 (1.06, 1.40) |
| 10-15 µg                                                                                                                                                                                                                                              | 1.19 (1.00, 1.42) |
| >15 µg                                                                                                                                                                                                                                                | 1.11 (0.93, 1.33) |
| OR=Odds Ratio, CI=Confidence interval                                                                                                                                                                                                                 |                   |
| Effect estimates derived by logistic regression, adjusted for maternal education, parity, maternal milk and yoghurt intake, maternal fiber intake and child's gender. The model with all mothers was also adjusted for maternal pre-pregnancy BMI.    |                   |
| <sup>a</sup> Overweight, including obesity, defined by Cole TJ, Lobstein T. Extended international (IOTF) body mass index cut-offs for thinness, overweight and obesity. <i>Pediatr Obes.</i> 2012;7(4):284-294. doi:10.1111/j.2047-6310.2012.00064.x |                   |
| <sup>b</sup> Mothers with pre-pregnancy BMI 18.5-24.9 kg/m <sup>2</sup>                                                                                                                                                                               |                   |
| <sup>c</sup> Mothers with pre-pregnancy BMI ≥25 kg/m <sup>2</sup>                                                                                                                                                                                     |                   |
